# Supplementary material for: NKX6.3 Regulates Reactive Oxygen Species Production by Suppressing NF-kB and DNMT1 Activities in Gastric Epithelial Cells
Source: PubMed Central journal article supplement (PMC5459835; doi:10.1038/s41598-017-02901-y), 2017-06-05
Supplement: 41598_2017_2901_MOESM1_ESM.pdf [file 41598_2017_2901_MOESM1_ESM.pdf]

# **NKX6.3 Regulates Reactive Oxygen Species Production by Suppressing NF- $\kappa$ B and DNMT1 Activities in Gastric Epithelial Cells**

Jung Hwan Yoon, Olga Kim, Suk Woo Nam, Jung Young Lee, Won Sang Park

Supplementary Figure S1. Expression of NKX6.3, Haxe1 and Nrf2 in gastric cancer cohort

Supplementary Figure S2. NKX6.3 inhibited *IL-6*, *IL-8* and *TNF- $\alpha$*  mRNA expression

Supplementary Figure S3. Uncropped gel image for Figure 1.

Supplementary Figure S4. Uncropped gel image for Figure 2.

Supplementary Figure S5. Uncropped gel image for Figure 3.

Supplementary Figure S6. Uncropped gel image for Figure 4.

Supplementary Figure S7. Uncropped gel image for Figure 5.

Supplementary Figure S8. Uncropped gel image for Figure 6.

Supplementary Figure S9. Uncropped gel image for Figure 7.

Supplementary Table S1. List of primers used in this study

Supplementary Table S2. List of antibodies used in this study

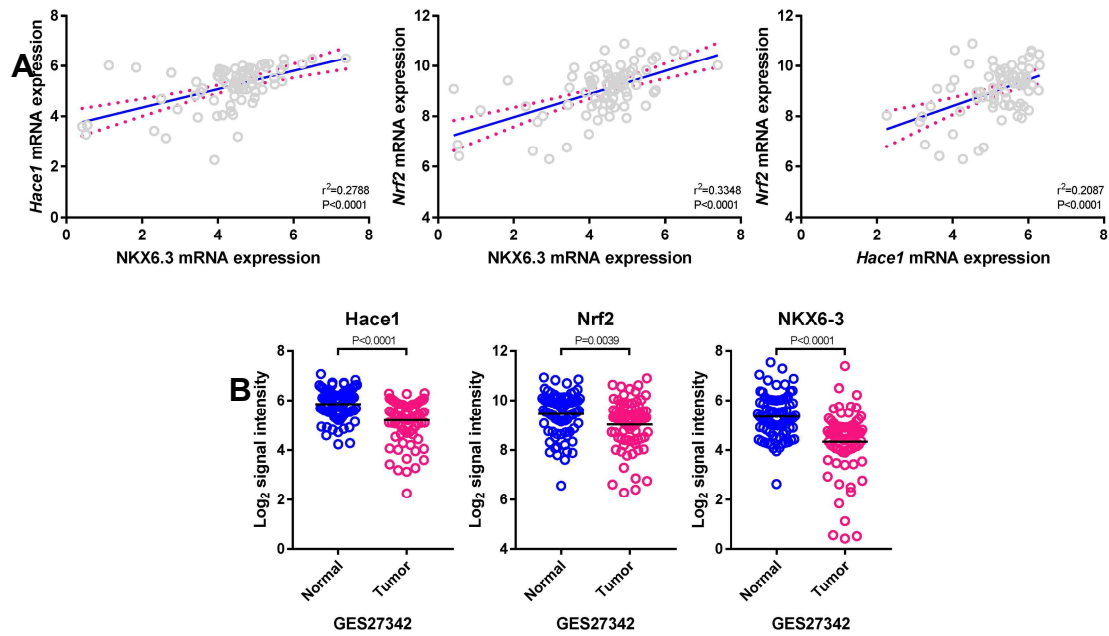

**Supplementary Figure S1. Expression of NKX6.3, Haxe1 and Nrf2 in gastric cancer cohort.**

**A.** Correlation between NKX6.3, Haxe1 and Nrf2 the large cohorts of gastric cancer patients. NKX6.3 expression was positively correlated with Haxe1 and Nrf2 expression, and the Haxe1 positively correlation with Nrf2 expression. **B.** *NKX6.3*, *Haxe1*, and *Nrf2* expression was reduced in the large cohorts of gastric cancer patients.

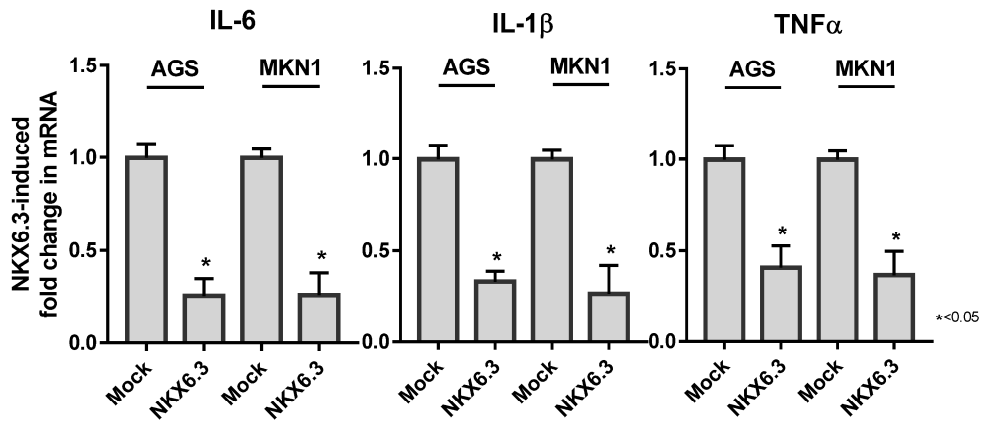

**Supplementary Figure S2. NKX6.3 inhibited *IL-6*, *IL-8* and *TNF- $\alpha$*  mRNA expression.**

NKX6.3 expression markedly reduced NF- $\kappa$ B downstream target genes, such as *IL-6*, *IL-8* and *TNF- $\alpha$*  mRNA expression.

**D**

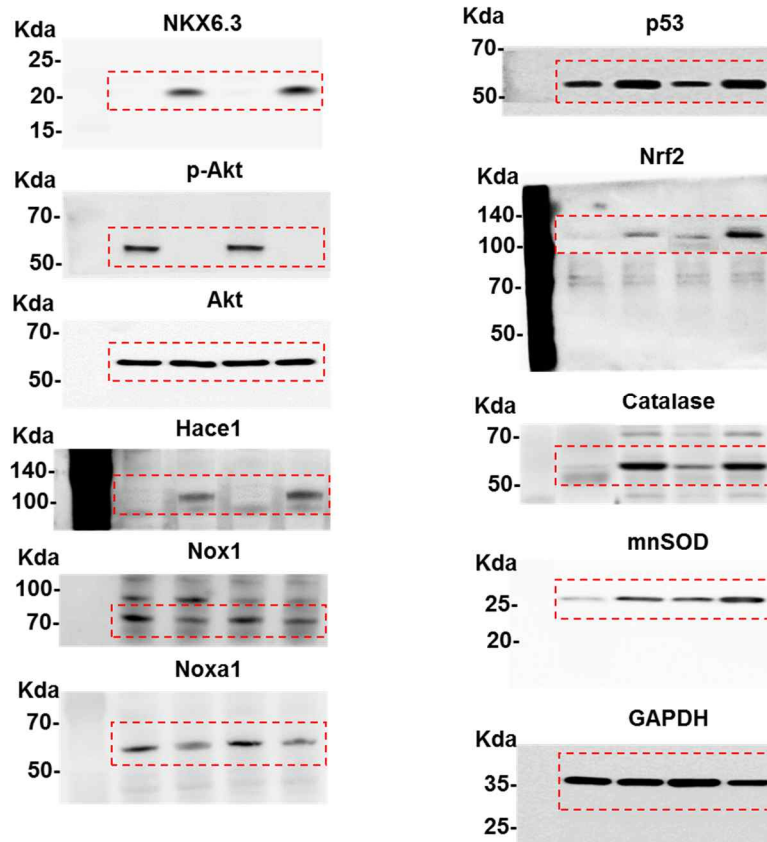

**Supplementary Figure S3. Uncropped gel image for Figure 1.**

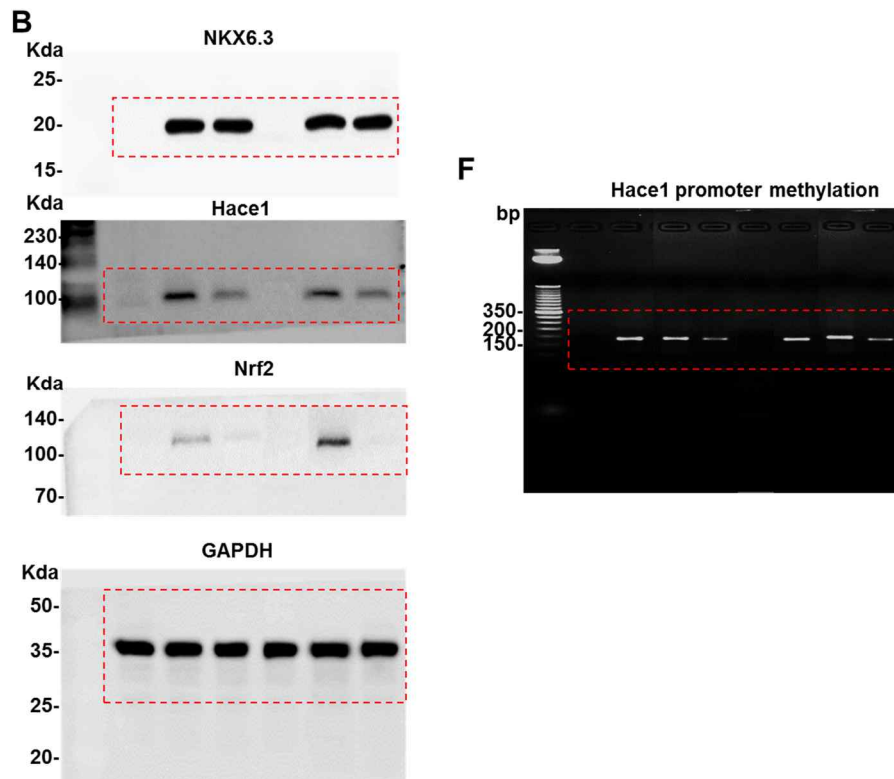

**Supplementary Figure S4. Uncropped gel image for Figure 2.**

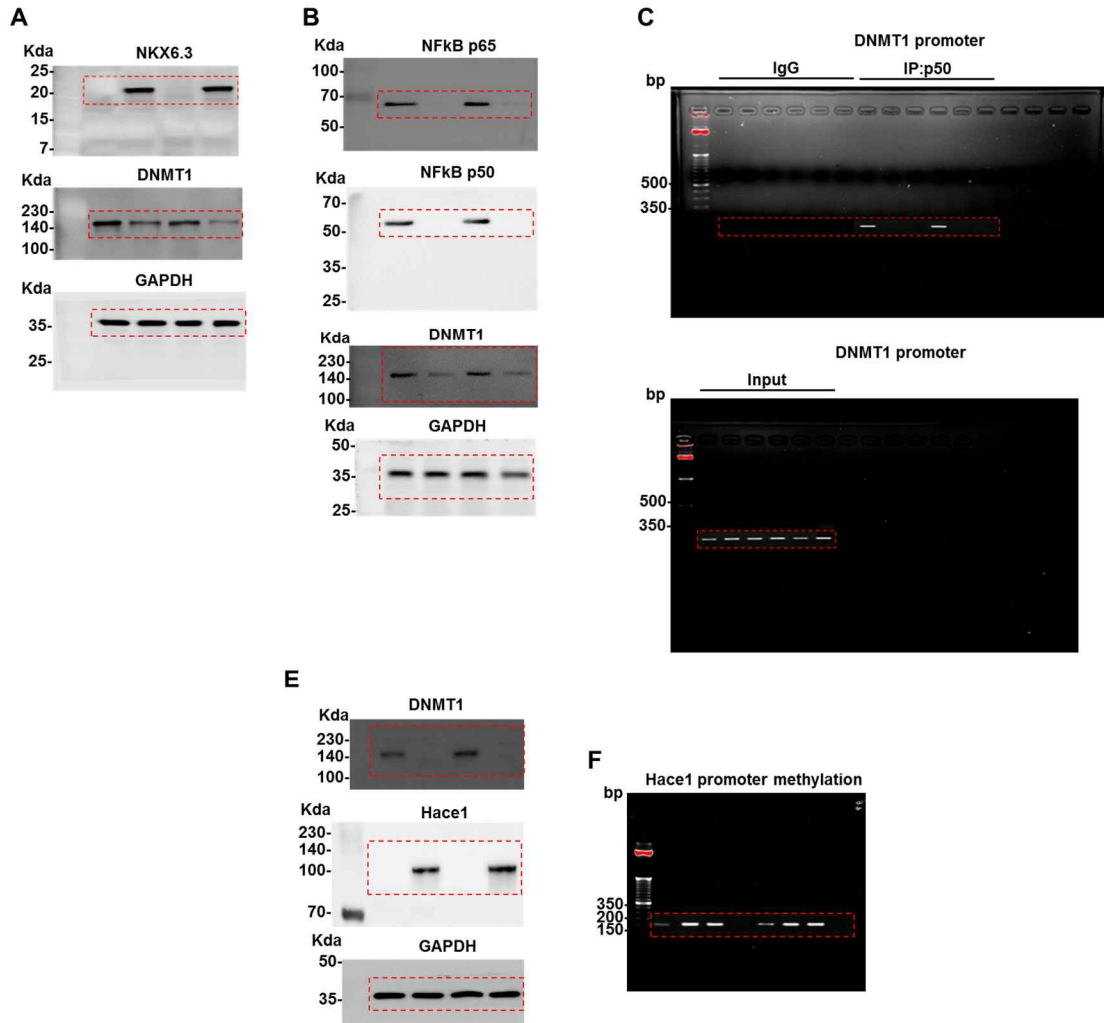

Supplementary Figure S5. Uncropped gel image for Figure 3.

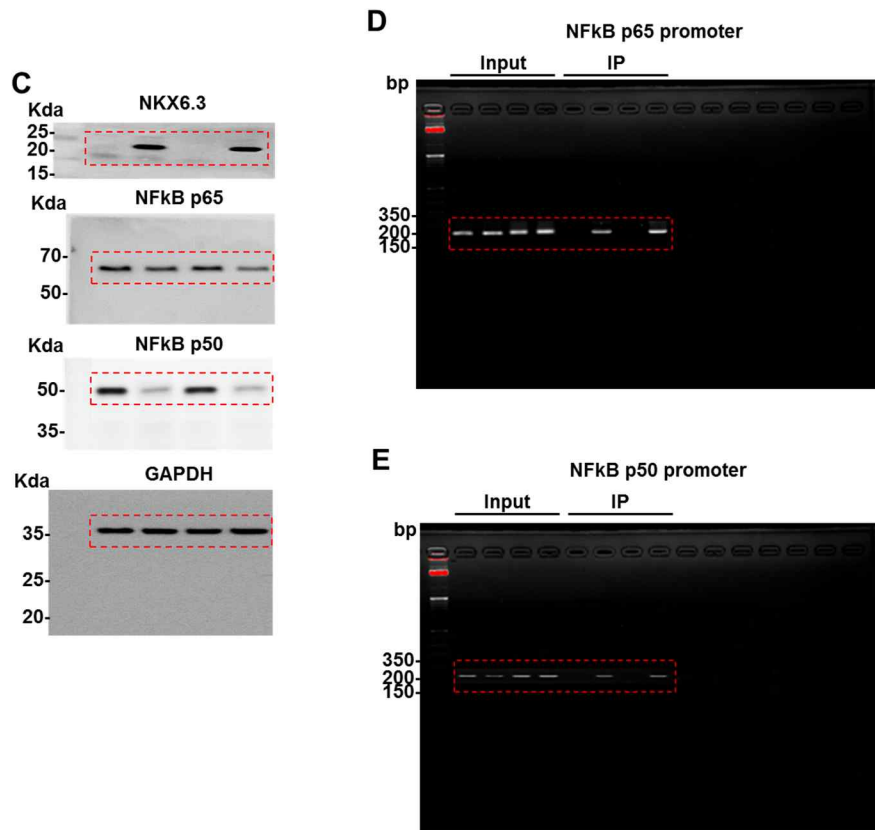

Supplementary Figure S6. Uncropped gel image for Figure 4.

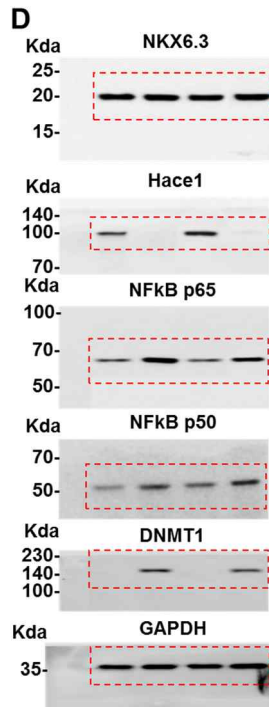

**Supplementary Figure S7. Uncropped gel image for Figure 5.**



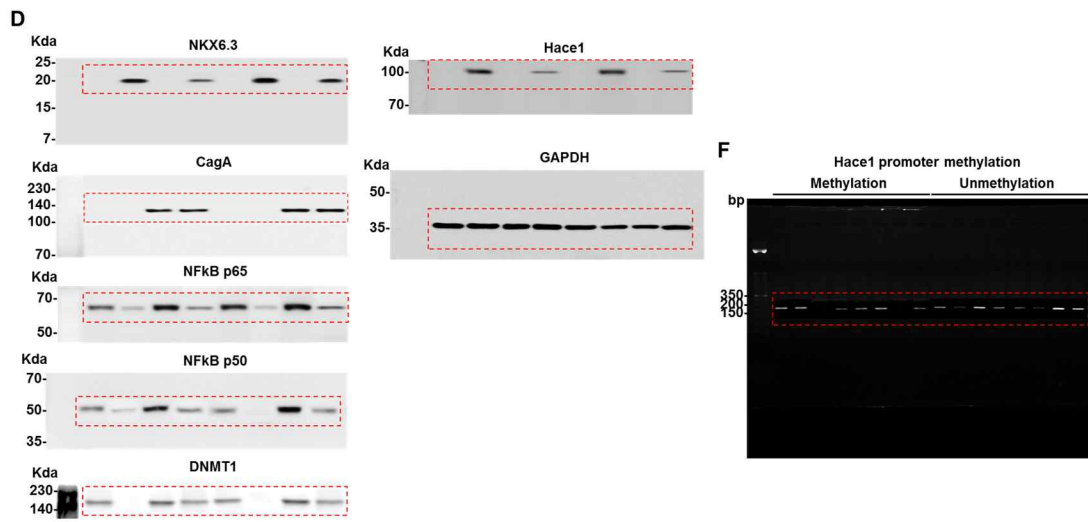

**Supplementary Figure S8. Uncropped gel image for Figure 6.**

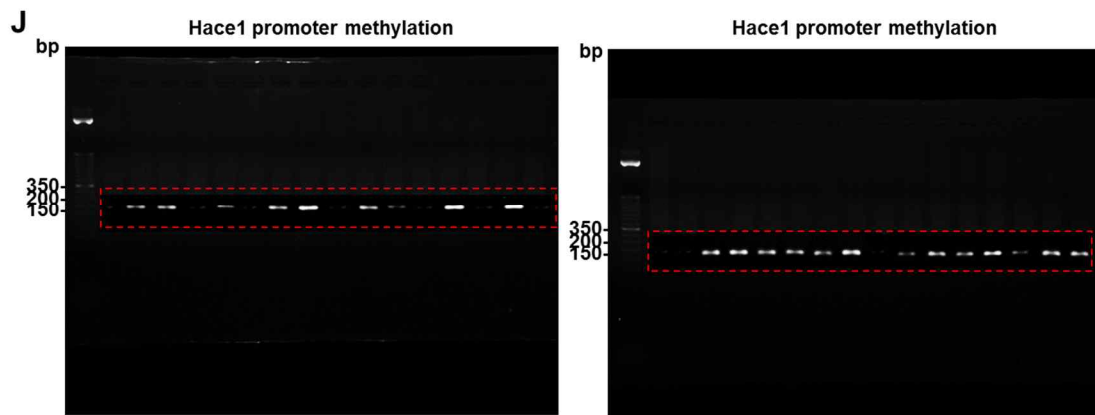

**Supplementary Figure S9. Uncropped gel image for Figure 7.**

**Supplementary Table 1. List of primers used in this study**

| Gene name                | primer sequence for real-time qPCR                                   |
|--------------------------|----------------------------------------------------------------------|
| <i>NKX6.3</i>            | F: TCTTTCTGCTTCTGGGGTGT<br>R: GTCCAGCGGCTTGTTGTA                     |
| <i>Hace1</i>             | F: CCATTGTACTTTGCTTGCAGTCATGG<br>R: GAAGCAGCATGTTGATCTTGGCCTTT       |
| <i>DNMT1</i>             | F: CTACCAGGGAGAAGGACAGG<br>R: CTCACAGACGCCACATCG                     |
| <i>NFκB p65</i>          | F: AGTACCTGCCAGATACAGACGAT<br>R: GATGGTGCTCAGGGATGACGTA              |
| <i>NFκB p50</i>          | F: AACAGAGAGGATTTCTGTTTCCG<br>R: TTTGACCTGAGGGTAAGACTTCA             |
| <i>GSH</i>               | F: CTCTACGGCTCACCCAATGC<br>R: TCGTCGGATCACATGGATGTT                  |
| <i>Nqo1</i>              | F: TGTATGACAAAGGACCCTTCC<br>R: CCCTTGCAGAGAGTACATGG                  |
| <i>Ho-1</i>              | F: ACTTTCAGAAGGGCCAGGT<br>R: TGGGCTCTCCTTGTTGC                       |
| <i>IL-6</i>              | F: AAGCCAGAGCTGTGCAGATGAGTA<br>R: TGTCTGCAGCCACTGGTTC                |
| <i>IL-8</i>              | F: ATGACTTCCAAGCTGGCCGTGG<br>R: TTATGAATTCTCAGCCCTCTTC               |
| <i>TNFα</i>              | F: GGCAGTCAGATCATCTT CTCGAA<br>R: AAGAGGACCTGGGAGT AGATGA            |
| <i>β-actin</i>           | F: GTTGCTATCCAGGCTGTG<br>R: TGATCTTGATCTTCATTGTG                     |
| Promoter name            | primer sequence for ChIP and ChIP-qPCR                               |
| DNMT1 promoter           | F: ACCTCAGCCTCCCAAGTA<br>R: ATCGCTTGAGGTTAGGAGTT                     |
| <i>NFκB p65 promoter</i> | F: TCTGGGCCAGGTGTGGTGGC<br>R: TGGCCTCACAAAGTGCTGGGA                  |
| <i>NFκB p50 promoter</i> | F: ATTTTTTCCCAGTTACAGTGTTACTATT<br>R: ATTTTCCTAAGGTTTCATAATTAGTAAATA |
| <i>Collagen</i>          | F: ATGGAGAAAGCAGCGAAGAA<br>R: AGCTGCTGTGGTGGAGAGAT                   |
| Primer name              | primer sequence for Hace1 promoter MSP                               |
| Methylation              | F: GAATGGAAGGTTTAATTTTCGC<br>R: CTAAAACCCTACGTCAACCG                 |
| Unmethylation            | F: TTGGAATGAATGGAAGGTTTAATTTT<br>R: CTAAAACCCTACATCAACCAACAA         |

**Supplementary Table 2. List of antibodies used in this study**

| Name        | Company                   | City                |
|-------------|---------------------------|---------------------|
| NKX6.3      | Atlas antibodies          | Stockholm, Sweden   |
| p-Akt       | Cell Signaling Technology | Beverly, MA, USA    |
| Akt         | Cell Signaling Technology | Beverly, MA, USA    |
| Hace1       | Santacruz                 | Santa Cruz, CA, USA |
| Nox1        | Santacruz                 | Santa Cruz, CA, USA |
| Noxa1       | Abcam                     | Cambrodge, MA, USA  |
| p53         | Cell Signaling Technology | Beverly, MA, USA    |
| Nrf2        | Cell Signaling Technology | Beverly, MA, USA    |
| Catalase    | Abcam                     | Cambrodge, MA, USA  |
| mnSOD       | Abcam                     | Cambrodge, MA, USA  |
| DNMT1       | Abcam                     | Cambrodge, MA, USA  |
| NFκB<br>p65 | Santacruz                 | Santa Cruz, CA, USA |
| NFκB<br>p50 | Santacruz                 | Santa Cruz, CA, USA |
| CagA        | Santacruz                 | Santa Cruz, CA, USA |
| GAPDH       | Abcam                     | Cambrodge, MA, USA  |
